# Supplementary material for: A Central Symmetrical and Low-Profile Omnidirectional Circularly Polarized Antenna
Source: Hindawi journal article supplement (doi:10.1155/2019/4303417), 2019-09-24
Supplement: f1 [file 4303417.f1.zip]

Archive with 2 entries (2 files):
- 4303417.f1/graph-data.xlsx
- 4303417.f1/size.docx
