# Supplementary material for: A Central Symmetrical and Low-Profile Omnidirectional Circularly Polarized Antenna
Source: Hindawi journal article supplement (doi:10.1155/2019/4303417), 2019-09-24
Supplement: f1 [file 4303417.f1.zip › 4303417.f1/graph-data.xlsx]

## Sheet: without-with-ring
Freq [GHz]	dB(S(1,1)) []
2.4	-0.02468	-0.18168
2.41	-0.02526	-0.22662
2.42	-0.02586	-0.29152
2.43	-0.0265	-0.38992
2.44	-0.02717	-0.54871
2.45	-0.02788	-0.82714
2.46	-0.02863	-1.37423
2.47	-0.02943	-2.63682
2.48	-0.03027	-6.3338
2.49	-0.03117	-28.5413
2.5	-0.03213	-6.56922
2.51	-0.03315	-2.75248
2.52	-0.03425	-1.45059
2.53	-0.03542	-0.88427
2.54	-0.03668	-0.5945
2.55	-0.03804	-0.42827
2.56	-0.0395	-0.32463
2.57	-0.04108	-0.25584
2.58	-0.0428	-0.20792
2.59	-0.04466	-0.17323
2.6	-0.04668	-0.14732
2.61	-0.04889
2.62	-0.05131
2.63	-0.05396
2.64	-0.05687
2.65	-0.06008
2.66	-0.06364
2.67	-0.06759
2.68	-0.07199
2.69	-0.07691
2.7	-0.08242
2.71	-0.08864
2.72	-0.09568
2.73	-0.10369
2.74	-0.11284
2.75	-0.12336
2.76	-0.13552
2.77	-0.14967
2.78	-0.16626
2.79	-0.18586
2.8	-0.20922
2.81	-0.2373
2.82	-0.27145
2.83	-0.31345
2.84	-0.36582
2.85	-0.43208
2.86	-0.51741
2.87	-0.62945
2.88	-0.77999
2.89	-0.98766
2.9	-1.28315
2.91	-1.71907
2.92	-2.38997
2.93	-3.47507
2.94	-5.33921
2.95	-8.83373
2.96	-16.7807
2.97	-17.0469
2.98	-9.10235
2.99	-5.64297
3	-3.79044
3.01	-2.69812
3.02	-2.01075
3.03	-1.55525
3.04	-1.24014
3.05	-1.01413
3.06	-0.84699
3.07	-0.72013
3.08	-0.62166
3.09	-0.54374
3.1	-0.48105
3.11	-0.42987
3.12	-0.38753
3.13	-0.35212
3.14	-0.32219
3.15	-0.29666
3.16	-0.27472
3.17	-0.25571
3.18	-0.23913
3.19	-0.22459
3.2	-0.21176

## Sheet: S11-fm
Freq [GHz]	dB(S(1,1)) [] - fi='46deg'	dB(S(1,1)) [] - fi='48deg'	dB(S(1,1)) [] - fi='52deg'	dB(S(1,1)) [] - fi='54deg'
2.4	-0.11225	-0.13302	-0.196	-0.29131
2.41	-0.13178	-0.15937	-0.24694	-0.39206
2.42	-0.15749	-0.19514	-0.32162	-0.55637
2.43	-0.19227	-0.24533	-0.43705	-0.84874
2.44	-0.24087	-0.31871	-0.62811	-1.43545
2.45	-0.31153	-0.43168	-0.97478	-2.83314
2.46	-0.41959	-0.61774	-1.68931	-7.15148
2.47	-0.59599	-0.95307	-3.45522	-23.3126
2.48	-0.91007	-1.63755	-9.27917	-5.65229
2.49	-1.54033	-3.30482	-15.0844	-2.43776
2.5	-3.03758	-8.64119	-4.74231	-1.30913
2.51	-7.61801	-16.347	-2.17934	-0.80859
2.52	-19.5353	-5.00284	-1.21569	-0.54879
2.53	-5.57042	-2.27099	-0.76946	-0.39814
2.54	-2.46308	-1.25623	-0.53096	-0.30345
2.55	-1.33937	-0.79048	-0.38978	-0.2402
2.56	-0.83304	-0.54317	-0.29969	-0.19592
2.57	-0.56772	-0.39749	-0.23881	-0.16372
2.58	-0.41294	-0.30486	-0.19579	-0.1396
2.59	-0.31525	-0.24245	-0.1643	-0.12105
2.6	-0.2498	-0.19847	-0.14055	-0.10649

## Sheet: AR-fm
Freq [GHz]	dB(AxialRatioValue) [] - fi='46deg' Phi='56deg' Theta='90deg'	dB(AxialRatioValue) [] - fi='48deg' Phi='56deg' Theta='90deg'	dB(AxialRatioValue) [] - fi='50deg' Phi='56deg' Theta='90deg'	dB(AxialRatioValue) [] - fi='52deg' Phi='56deg' Theta='90deg'	dB(AxialRatioValue) [] - fi='54deg' Phi='56deg' Theta='90deg'	dB(AxialRatioValue) [] - fi='56deg' Phi='56deg' Theta='90deg'
2.4	2.8115	2.29967	2.29169	1.65299	1.19337	1.83852
2.41	2.62498	2.12129	2.30546	1.50041	1.07976	1.97048
2.42	2.44398	1.94917	2.33162	1.35957	0.99072	2.10408
2.43	2.26882	1.78403	2.36939	1.23312	0.93161	2.23871
2.44	2.09997	1.62686	2.41786	1.12452	0.9067	2.37393
2.45	1.93805	1.47901	2.47606	1.03792	0.91728	2.50939
2.46	1.78392	1.34237	2.54304	0.97776	0.96085	2.64483
2.47	1.63873	1.21945	2.61788	0.94768	1.03206	2.78007
2.48	1.50397	1.11352	2.69967	0.94925	1.12469	2.91494
2.49	1.38162	1.02852	2.78762	0.98114	1.23305	3.04932
2.5	1.27412	0.96867	2.88099	1.03952	1.35264	3.18313
2.51	1.18439	0.93753	2.97912	1.11933	1.48009	3.3163
2.52	1.11557	0.93675	3.08143	1.21557	1.61301	3.44878
2.53	1.07061	0.96532	3.18743	1.32398	1.74966	3.58051
2.54	1.05148	1.01979	3.29671	1.44122	1.88883	3.71147
2.55	1.05857	1.09545	3.40889	1.5648	2.02962	3.84163
2.56	1.09047	1.18749	3.5237	1.69286	2.1714	3.97098
2.57	1.14425	1.29178	3.6409	1.82408	2.3137	4.0995
2.58	1.21629	1.40501	3.76033	1.95747	2.45618	4.22717
2.59	1.30289	1.52469	3.88189	2.09231	2.59857	4.35398
2.6	1.40079	1.64898	4.00551	2.22806	2.74069	4.47993

## Sheet: S11-d
Freq [GHz]	dB(S(1,1)) [] - r1='0.3mm'	dB(S(1,1)) [] - r1='0.5mm'	dB(S(1,1)) [] - r1='0.7mm'	dB(S(1,1)) [] - r1='0.9mm'
2.4	-2.80608	-0.196	-0.04264	-0.02195
2.41	-1.71224	-0.24694	-0.04733	-0.02334
2.42	-1.13892	-0.32162	-0.0531	-0.02499
2.43	-0.80888	-0.43705	-0.06033	-0.02694
2.44	-0.60397	-0.62811	-0.06955	-0.02931
2.45	-0.46891	-0.97478	-0.08154	-0.03221
2.46	-0.37553	-1.68931	-0.09755	-0.03582
2.47	-0.30843	-3.45522	-0.11956	-0.04039
2.48	-0.25866	-9.27917	-0.15095	-0.0463
2.49	-0.22075	-15.0844	-0.1978	-0.05412
2.5	-0.19124	-4.74231	-0.27194	-0.06477
2.51	-0.16782	-2.17934	-0.39878	-0.07979
2.52	-0.14892	-1.21569	-0.64042	-0.10188
2.53	-0.13347	-0.76946	-1.17749	-0.1362
2.54	-0.12066	-0.53096	-2.66707	-0.19349
2.55	-0.10993	-0.38978	-7.64424	-0.29896
2.56	-0.10086	-0.29969	-6.54851	-0.52221
2.57	-0.09312	-0.23881	-2.37215	-1.10019
2.58	-0.08646	-0.19579	-1.11079	-2.93448
2.59	-0.0807	-0.1643	-0.63231	-4.5599
2.6	-0.07568	-0.14055	-0.40839	-1.82245

## Sheet: AR-d
Freq [GHz]	dB(AxialRatioValue) [] - fi='52deg' Phi='56deg' r1='0.3mm' Theta='90deg'	dB(AxialRatioValue) [] - fi='52deg' Phi='56deg' r1='0.5mm' Theta='90deg'	dB(AxialRatioValue) [] - fi='52deg' Phi='56deg' r1='0.7mm' Theta='90deg'	dB(AxialRatioValue) [] - fi='52deg' Phi='56deg' r1='0.9mm' Theta='90deg'
2.4	1.1535	1.65299	2.17657	2.39596
2.41	1.06379	1.50041	1.98322	2.17435
2.42	0.99495	1.35957	1.79687	1.95788
2.43	0.95025	1.23312	1.61865	1.74724
2.44	0.93195	1.12452	1.45017	1.5435
2.45	0.94045	1.03792	1.29381	1.34842
2.46	0.97404	0.97776	1.15301	1.16487
2.47	1.02935	0.94768	1.03256	0.99762
2.48	1.10231	0.94925	0.93872	0.85454
2.49	1.18897	0.98114	0.8784	0.74778
2.5	1.28595	1.03952	0.85713	0.6925
2.51	1.39055	1.11933	0.87634	0.69933
2.52	1.50072	1.21557	0.93225	0.76524
2.53	1.6149	1.32398	1.01776	0.87593
2.54	1.73192	1.44122	1.12522	1.01603
2.55	1.85092	1.5648	1.2482	1.17442
2.56	1.97125	1.69286	1.38189	1.34415
2.57	2.09243	1.82408	1.5229	1.52106
2.58	2.21406	1.95747	1.66891	1.70264
2.59	2.33588	2.09231	1.81828	1.88733
2.6	2.45765	2.22806	1.96988	2.07418

## Sheet: S11-Rf
Freq [GHz]	dB(S(1,1)) [] - mk='8.5mm'	dB(S(1,1)) [] - mk='8.9mm'	dB(S(1,1)) [] - mk='9mm'	dB(S(1,1)) [] - mk='9.05mm'	dB(S(1,1)) [] - mk='9.1mm'	dB(S(1,1)) [] - mk='9.5mm'	dB(S(1,1)) [] - mk='10mm'
2.4	-0.30824	-0.20978	-0.19694	-0.18819	-0.1829	-0.14263	-0.11216
2.41	-0.42562	-0.26793	-0.24838	-0.2355	-0.2277	-0.17055	-0.12957
2.42	-0.62581	-0.35512	-0.32394	-0.30414	-0.29213	-0.20823	-0.15184
2.43	-1.0048	-0.49381	-0.44098	-0.40877	-0.38929	-0.26072	-0.18092
2.44	-1.83652	-0.73242	-0.63529	-0.57888	-0.545	-0.33674	-0.21986
2.45	-4.09715	-1.1892	-0.98938	-0.88012	-0.81544	-0.45235	-0.27359
2.46	-12.7763	-2.20555	-1.72364	-1.48009	-1.33962	-0.63961	-0.35049
2.47	-8.91463	-5.01953	-3.55472	-2.89124	-2.525	-0.96921	-0.46563
2.48	-3.25476	-17.3958	-9.69999	-7.15276	-5.8851	-1.61889	-0.64829
2.49	-1.58049	-8.15826	-14.1639	-24.5981	-24.4604	-3.11828	-0.96071
2.5	-0.91555	-3.17165	-4.5685	-5.93965	-7.32191	-7.49907	-1.55139
2.51	-0.59532	-1.60044	-2.11695	-2.57333	-3.00211	-25.9112	-2.83125
2.52	-0.4191	-0.94869	-1.18718	-1.3834	-1.5613	-6.35485	-6.1869
2.53	-0.31247	-0.62584	-0.75409	-0.85418	-0.94292	-2.81325	-18.96
2.54	-0.24326	-0.4448	-0.52166	-0.57926	-0.62964	-1.52819	-8.41638
2.55	-0.19587	-0.3338	-0.38365	-0.41984	-0.45124	-0.94824	-3.61246
2.56	-0.16203	-0.26104	-0.29537	-0.31966	-0.34063	-0.64456	-1.91532
2.57	-0.13704	-0.21085	-0.23562	-0.25277	-0.26755	-0.46766	-1.16562
2.58	-0.11805	-0.1748	-0.19334	-0.20595	-0.2168	-0.35617	-0.78046
2.59	-0.1033	-0.14805	-0.16235	-0.17193	-0.18017	-0.28159	-0.55957
2.6	-0.09162	-0.12766	-0.13896	-0.14644	-0.15288	-0.22933	-0.42211

## Sheet: AR-Rf
Freq [GHz]	dB(AxialRatioValue) [] - mk='8.5mm' Phi='56deg' Theta='90deg'	dB(AxialRatioValue) [] - mk='9mm' Phi='56deg' Theta='90deg'	dB(AxialRatioValue) [] - mk='9.01mm' Phi='56deg' Theta='90deg'	dB(AxialRatioValue) [] - mk='9.5mm' Phi='56deg' Theta='90deg'	dB(AxialRatioValue) [] - mk='10mm' Phi='56deg' Theta='90deg'
2.4	1.71206	1.67951	1.65299	1.922	1.77475
2.41	1.5547	1.52773	1.50041	1.75906	1.61514
2.42	1.40927	1.38707	1.35957	1.60474	1.46473
2.43	1.27845	1.25992	1.23312	1.46057	1.32538
2.44	1.16571	1.14942	1.12452	1.32861	1.19962
2.45	1.07526	1.0594	1.03792	1.2116	1.09082
2.46	1.01163	0.99405	0.97776	1.11298	1.0031
2.47	0.97865	0.9571	0.94768	1.03669	0.941
2.48	0.97808	0.95058	0.94925	0.98664	0.90842
2.49	1.00877	0.97395	0.98114	0.9657	0.9073
2.5	1.06695	1.02411	1.03952	0.97458	0.93659
2.51	1.14751	1.09648	1.11933	1.01148	0.99258
2.52	1.24529	1.18622	1.21557	1.07258	1.07019
2.53	1.35589	1.28901	1.32398	1.15323	1.16435
2.54	1.4758	1.40138	1.44122	1.24897	1.27072
2.55	1.60241	1.5207	1.5648	1.35598	1.3859
2.56	1.7338	1.64499	1.69286	1.47128	1.50738
2.57	1.86854	1.77282	1.82408	1.5926	1.63332
2.58	2.00562	1.90312	1.95747	1.71827	1.76238
2.59	2.14426	2.0351	2.09231	1.84705	1.89359
2.6	2.2839	2.16819	2.22806	1.97801	2.02623

## Sheet: S11-HFSS-Measure
2.4	-0.18168	-0.58006
2.405	-0.20221	-0.61502
2.41	-0.22662	-0.65666
2.415	--	-0.66438
2.42	-0.29152	-0.7146
2.425	--	-0.74102
2.43	-0.38992	-0.80951
2.435	--	-0.87824
2.44	-0.54871	-0.97315
2.445	--	-1.08349
2.45	-0.82714	-1.22731
2.455	--	-1.43525
2.46	-1.37423	-1.73016
2.465	--	-2.15971
2.47	-2.63682	-2.82143
2.475	-3.94393	-4.84614
2.48	-6.3338	-9.53197
2.485	-11.3729	-14.1212
2.49	-28.5413	-17.6625
2.495	-11.8425	-14.2641
2.5	-6.56922	-10.3483
2.505	-4.09945	-7.29953
2.51	-2.75248	-4.05471
2.515	--	-2.27826
2.52	-1.45059	-1.80169
2.525	--	-1.44948
2.53	-0.88427	-1.22649
2.535	--	-1.08187
2.54	-0.5945	-0.96719
2.545	--	-0.88108
2.55	-0.42827	-0.82234
2.555	--	-0.76597
2.56	-0.32463	-0.72688
2.565	--	-0.66682
2.57	-0.25584	-0.67095
2.575	--	-0.64608
2.58	-0.20792	-0.6088
2.585	--	-0.61816
2.59	-0.17323	-0.59408
2.595	--	-0.5731
2.6	-0.14732	-0.56558

## Sheet: AR-HFSS-Measure
-180	0.92852	2.87174
-179	0.92851	2.86623
-178	0.92852	2.86101
-177	0.92853	2.85609
-176	0.92856	2.85147
-175	0.92859	2.84714
-174	0.92864	2.84311
-173	0.92869	2.83936
-172	0.92876	2.83591
-171	0.92884	2.83274
-170	0.92892	2.82984
-169	0.92902	2.82722
-168	0.92913	2.82487
-167	0.92925	2.82278
-166	0.92938	2.82095
-165	0.92952	2.81936
-164	0.92967	2.81802
-163	0.92984	2.8169
-162	0.93001	2.81602
-161	0.93019	2.81535
-160	0.93038	2.81489
-159	0.93058	2.81464
-158	0.93079	2.81458
-157	0.93101	2.81471
-156	0.93123	2.81502
-155	0.93146	2.8155
-154	0.9317	2.81615
-153	0.93195	2.81696
-152	0.93221	2.81792
-151	0.93247	2.81902
-150	0.93273	2.82027
-149	0.933	2.82164
-148	0.93328	2.82315
-147	0.93355	2.82478
-146	0.93384	2.82652
-145	0.93412	2.82838
-144	0.93441	2.83035
-143	0.9347	2.83241
-142	0.93499	2.83458
-141	0.93528	2.83684
-140	0.93557	2.83919
-139	0.93586	2.84162
-138	0.93615	2.84414
-137	0.93644	2.84673
-136	0.93673	2.8494
-135	0.93702	2.85215
-134	0.93731	2.85496
-133	0.9376	2.85784
-132	0.93788	2.86078
-131	0.93817	2.86378
-130	0.93845	2.86684
-129	0.93873	2.86995
-128	0.93901	2.87311
-127	0.93929	2.87631
-126	0.93957	2.87957
-125	0.93985	2.88287
-124	0.94013	2.8862
-123	0.94042	2.88958
-122	0.9407	2.89298
-121	0.94098	2.89643
-120	0.94127	2.8999
-119	0.94157	2.9034
-118	0.94187	2.90692
-117	0.94217	2.91047
-116	0.94248	2.91405
-115	0.9428	2.91764
-114	0.94313	2.92125
-113	0.94347	2.92488
-112	0.94382	2.92852
-111	0.94418	2.93218
-110	0.94456	2.93586
-109	0.94495	2.93955
-108	0.94536	2.94325
-107	0.94578	2.94696
-106	0.94623	2.95068
-105	0.94669	2.95441
-104	0.94718	2.95815
-103	0.94769	2.9619
-102	0.94822	2.96566
-101	0.94878	2.96942
-100	0.94936	2.9732
-99	0.94997	2.97698
-98	0.95061	2.98076
-97	0.95127	2.98455
-96	0.95197	2.98834
-95	0.95269	2.99214
-94	0.95345	2.99593
-93	0.95423	2.99972
-92	0.95505	3.00351
-91	0.9559	3.00729
-90	0.95678	3.01106
-89	0.95769	3.01482
-88	0.95863	3.01857
-87	0.9596	3.02229
-86	0.9606	3.02599
-85	0.96163	3.02966
-84	0.96269	3.0333
-83	0.96378	3.0369
-82	0.9649	3.04046
-81	0.96604	3.04396
-80	0.9672	3.04741
-79	0.96839	3.0508
-78	0.9696	3.05411
-77	0.97084	3.05736
-76	0.97209	3.06051
-75	0.97335	3.06358
-74	0.97463	3.06655
-73	0.97592	3.06941
-72	0.97723	3.07216
-71	0.97854	3.07479
-70	0.97986	3.07729
-69	0.98118	3.07966
-68	0.9825	3.08188
-67	0.98382	3.08396
-66	0.98513	3.08588
-65	0.98644	3.08763
-64	0.98774	3.08922
-63	0.98903	3.09064
-62	0.9903	3.09187
-61	0.99156	3.09293
-60	0.9928	3.09379
-59	0.99402	3.09446
-58	0.99521	3.09494
-57	0.99638	3.09522
-56	0.99753	3.0953
-55	0.99864	3.09518
-54	0.99972	3.09486
-53	1.00077	3.09434
-52	1.00178	3.09362
-51	1.00276	3.0927
-50	1.0037	3.09159
-49	1.00459	3.09028
-48	1.00545	3.08878
-47	1.00627	3.08709
-46	1.00704	3.08523
-45	1.00778	3.08318
-44	1.00846	3.08097
-43	1.00911	3.0786
-42	1.00971	3.07607
-41	1.01026	3.07339
-40	1.01077	3.07057
-39	1.01124	3.06763
-38	1.01166	3.06456
-37	1.01204	3.06137
-36	1.01238	3.05809
-35	1.01268	3.05471
-34	1.01293	3.05125
-33	1.01315	3.04772
-32	1.01333	3.04413
-31	1.01347	3.04049
-30	1.01357	3.03681
-29	1.01365	3.0331
-28	1.01368	3.02937
-27	1.01369	3.02563
-26	1.01367	3.02189
-25	1.01362	3.01816
-24	1.01355	3.01445
-23	1.01345	3.01078
-22	1.01333	3.00714
-21	1.01319	3.00355
-20	1.01303	3.00001
-19	1.01286	2.99654
-18	1.01267	2.99314
-17	1.01248	2.98981
-16	1.01227	2.98656
-15	1.01205	2.9834
-14	1.01183	2.98034
-13	1.0116	2.97736
-12	1.01137	2.97448
-11	1.01114	2.97171
-10	1.01091	2.96903
-9	1.01067	2.96646
-8	1.01045	2.964
-7	1.01022	2.96163
-6	1.01	2.95937
-5	1.00979	2.95721
-4	1.00958	2.95515
-3	1.00938	2.95319
-2	1.00918	2.95132
-1	1.009	2.94953
0	1.00882	2.94783
1	1.00865	2.94622
2	1.00849	2.94467
3	1.00833	2.9432
4	1.00819	2.94179
5	1.00805	2.94043
6	1.00792	2.93912
7	1.00779	2.93786
8	1.00767	2.93664
9	1.00755	2.93544
10	1.00744	2.93426
11	1.00733	2.9331
12	1.00722	2.93195
13	1.00711	2.9308
14	1.007	2.92964
15	1.00689	2.92847
16	1.00678	2.92728
17	1.00666	2.92607
18	1.00654	2.92483
19	1.0064	2.92355
20	1.00626	2.92224
21	1.00612	2.92088
22	1.00596	2.91947
23	1.00578	2.91802
24	1.0056	2.91651
25	1.0054	2.91495
26	1.00519	2.91334
27	1.00496	2.91167
28	1.00471	2.90995
29	1.00444	2.90818
30	1.00416	2.90636
31	1.00386	2.90449
32	1.00354	2.90258
33	1.0032	2.90064
34	1.00284	2.89866
35	1.00247	2.89665
36	1.00207	2.89463
37	1.00165	2.89259
38	1.00121	2.89055
39	1.00076	2.88852
40	1.00028	2.8865
41	0.99978	2.88451
42	0.99927	2.88255
43	0.99874	2.88064
44	0.99819	2.87879
45	0.99763	2.87701
46	0.99705	2.87531
47	0.99645	2.87371
48	0.99584	2.87222
49	0.99522	2.87084
50	0.99459	2.8696
51	0.99394	2.86851
52	0.99328	2.86758
53	0.99261	2.86681
54	0.99193	2.86624
55	0.99124	2.86586
56	0.99055	2.86568
57	0.98984	2.86573
58	0.98913	2.86601
59	0.98842	2.86653
60	0.98769	2.8673
61	0.98697	2.86833
62	0.98623	2.86963
63	0.9855	2.8712
64	0.98476	2.87306
65	0.98401	2.87521
66	0.98326	2.87765
67	0.98251	2.8804
68	0.98176	2.88344
69	0.981	2.88679
70	0.98024	2.89045
71	0.97947	2.89442
72	0.97871	2.89869
73	0.97794	2.90328
74	0.97716	2.90816
75	0.97639	2.91335
76	0.97561	2.91883
77	0.97482	2.9246
78	0.97404	2.93066
79	0.97325	2.937
80	0.97245	2.9436
81	0.97166	2.95046
82	0.97086	2.95757
83	0.97006	2.96492
84	0.96925	2.9725
85	0.96844	2.98028
86	0.96763	2.98827
87	0.96681	2.99644
88	0.966	3.00477
89	0.96518	3.01326
90	0.96436	3.02188
91	0.96353	3.03062
92	0.96271	3.03946
93	0.96189	3.04837
94	0.96106	3.05734
95	0.96024	3.06636
96	0.95942	3.07539
97	0.9586	3.08442
98	0.95779	3.09342
99	0.95698	3.10238
100	0.95617	3.11127
101	0.95537	3.12008
102	0.95457	3.12877
103	0.95379	3.13733
104	0.95301	3.14573
105	0.95224	3.15395
106	0.95147	3.16198
107	0.95072	3.16979
108	0.94998	3.17735
109	0.94926	3.18466
110	0.94854	3.19168
111	0.94784	3.1984
112	0.94715	3.2048
113	0.94648	3.21086
114	0.94582	3.21657
115	0.94518	3.2219
116	0.94456	3.22684
117	0.94395	3.23138
118	0.94336	3.23551
119	0.94278	3.2392
120	0.94222	3.24245
121	0.94168	3.24525
122	0.94116	3.24759
123	0.94065	3.24946
124	0.94016	3.25086
125	0.93969	3.25177
126	0.93923	3.2522
127	0.93879	3.25214
128	0.93837	3.25159
129	0.93796	3.25055
130	0.93757	3.24903
131	0.93719	3.24702
132	0.93683	3.24453
133	0.93648	3.24156
134	0.93614	3.23813
135	0.93581	3.23424
136	0.9355	3.22991
137	0.9352	3.22513
138	0.93491	3.21993
139	0.93463	3.21431
140	0.93436	3.2083
141	0.93409	3.2019
142	0.93384	3.19514
143	0.93359	3.18803
144	0.93336	3.18059
145	0.93313	3.17284
146	0.9329	3.16481
147	0.93268	3.1565
148	0.93247	3.14794
149	0.93226	3.13916
150	0.93206	3.13017
151	0.93187	3.121
152	0.93168	3.11168
153	0.93149	3.10222
154	0.93131	3.09265
155	0.93113	3.08299
156	0.93096	3.07326
157	0.93079	3.06349
158	0.93063	3.0537
159	0.93047	3.04392
160	0.93031	3.03416
161	0.93016	3.02445
162	0.93002	3.0148
163	0.92988	3.00524
164	0.92975	2.99579
165	0.92962	2.98647
166	0.92949	2.97728
167	0.92938	2.96827
168	0.92927	2.95942
169	0.92916	2.95078
170	0.92906	2.94234
171	0.92897	2.93412
172	0.92889	2.92613
173	0.92881	2.91839
174	0.92875	2.9109
175	0.92869	2.90367
176	0.92864	2.89672
177	0.92859	2.89005
178	0.92856	2.88366
179	0.92853	2.87755
180	0.92852	2.87174

## Sheet: GainLHCP
Freq [GHz]	dB(GainLHCP) [] - Phi='0deg' Theta='90deg'
2.4	0.68145
2.405	0.72249
2.41	0.76193
2.415	0.79975
2.42	0.8359
2.425	0.87033
2.43	0.903
2.435	0.93388
2.44	0.96294
2.445	0.99013
2.45	1.01543
2.455	1.03881
2.46	1.06024
2.465	1.07971
2.47	1.0972
2.475	1.11268
2.48	1.12614
2.485	1.13758
2.49	1.14698
2.495	1.15435
2.5	1.15968
2.505	1.16297
2.51	1.16423
2.515	1.16347
2.52	1.16069
2.525	1.15593
2.53	1.14918
2.535	1.14047
2.54	1.12983
2.545	1.11728
2.55	1.10284
2.555	1.08655
2.56	1.06844
2.565	1.04854
2.57	1.02689
2.575	1.00353
2.58	0.97849
2.585	0.95182
2.59	0.92356
2.595	0.89375
2.6	0.86243

[truncated: 3 more sheets: AR, Gain-sim-mea-LHCP, Gain-sim-mea-RHCP]
