# Supplementary material for: A Central Symmetrical and Low-Profile Omnidirectional Circularly Polarized Antenna
Source: Hindawi journal article supplement (doi:10.1155/2019/4303417), 2019-09-24
Supplement: f1 [file 4303417.f1.zip › 4303417.f1/size.docx]

|  | Size(mm,deg) |
| --- | --- |
| Rm | 16 |
| Rl | 12 |
| Rs | 11.5 |
|  | 52drg |
|  | 55deg |
|  | 62eg |
| ds | 1 |
| dk | 1 |
| d | 1 |
